# Supplementary material for: Colored, see-through perovskite solar cells employing an optical cavity
Source: Royal Society of Chemistry journal article supplement (doi:10.1039/c5tc00622h), 2015-01-01
Supplement: c5tc00622h1.pdf [file c5tc00622h1.pdf]

## Supporting Information

### Colored, see-through perovskite solar cells employing an optical cavity

Kyu-Tae Lee,<sup>a,‡</sup> Masanori Fukuda,<sup>a,‡</sup> Suneel Joglekar,<sup>a</sup> and L. Jay Guo<sup>a,\*</sup>

<sup>a</sup> Department of Electrical Engineering and Computer Science,  
The University of Michigan, Ann Arbor, Michigan 48109, USA  
E-mail: guo@umich.edu

<sup>‡</sup> These authors contributed equally to this work.

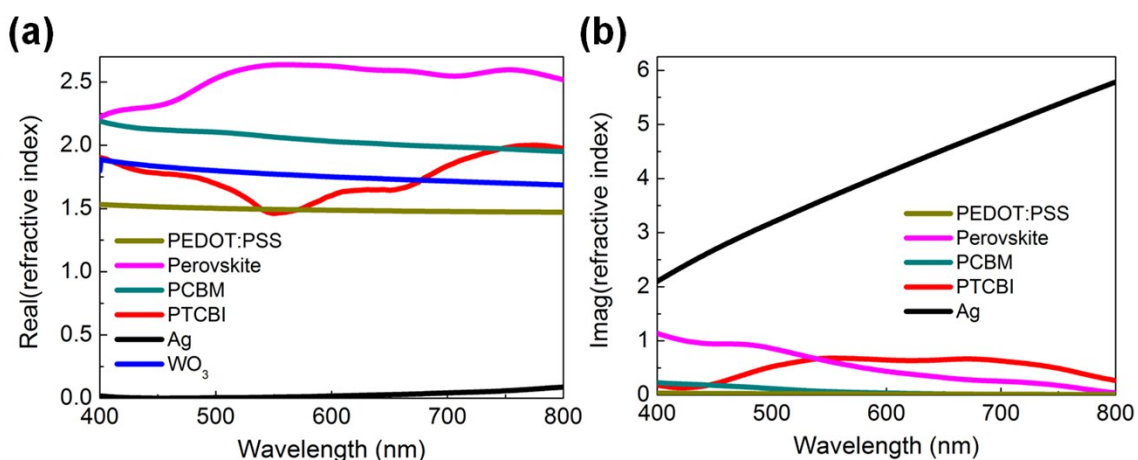

**Fig. S1** The real (a) and imaginary (b) part of refractive indices of PEDOT:PSS, perovskite, PCBM, PTCBI, Ag, and WO<sub>3</sub>.
